# Supplementary material
Source: PubMed Central journal article supplement (PMC4807165)
Supplement: ijbsv12p0466s1.pdf [file ijbsv12p0466s1.pdf]

## Supplementary Material

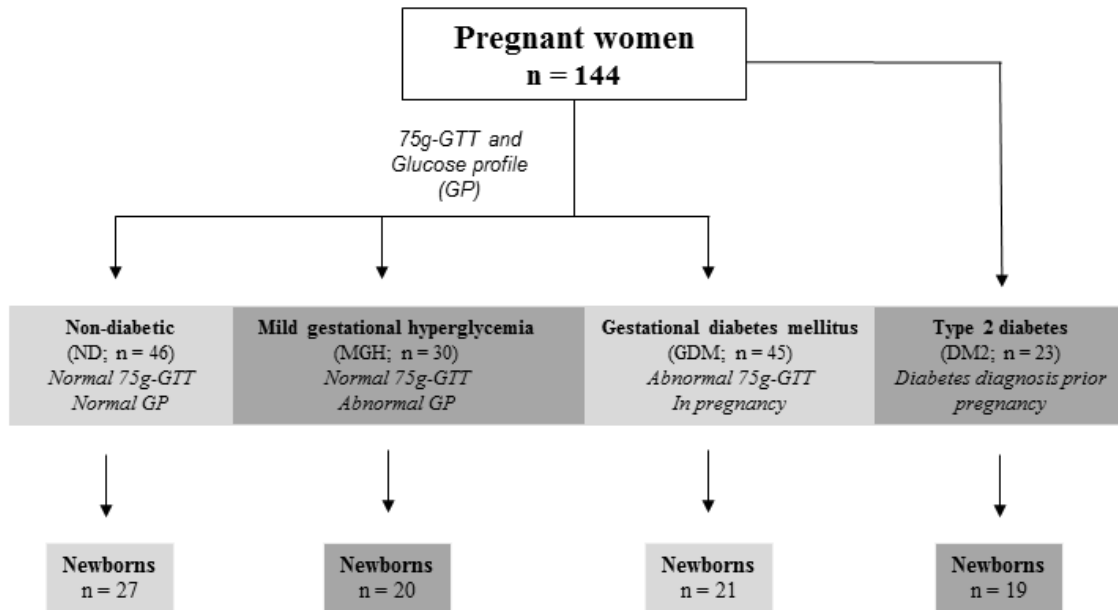

**Figure S1. Study groups and sample size.** The MGH and GDM diagnosis was established between 24<sup>th</sup> and 28<sup>th</sup> gestational weeks according the 75 g-GTT and glucose profile (GP) results. The DM2 were referred to the Diabetes and Pregnancy Service with a confirmed diagnosis.

**Table S1:** Gene targets, primers pairs and cycles for QPCR

| Targets Genes                                           | Fragment length | Primers Pairs                                            | Cycles                                                                                       |
|---------------------------------------------------------|-----------------|----------------------------------------------------------|----------------------------------------------------------------------------------------------|
| Nuclear fragment<br>Region near the $\beta$ Globin gene | 13.5 Kb         | F: 5'-CGA GTA AGA GAC CAT TGT GGC AG-3'<br>(GI 48510)    | 75°C – 2 min<br>94°C - 1 min<br>94°C – 15 seg<br>64°C – 12 min<br>72°C – 10 min<br>21 cycles |
|                                                         |                 | R: 5'-GCA CTG GCT TAG GAG TTG GAC T-3'<br>(GI 62007)     |                                                                                              |
| Mitochondrial fragment                                  | 8.9 Kb          | F: 5'-TCT AAG CCT CCT TAT TCG AGC CGA-3'<br>(GI5999)     | 75°C – 2 min<br>94°C - 1 min<br>94°C – 15 seg<br>64°C – 12 min<br>72°C – 10 min<br>17 cycles |
|                                                         |                 | R: 5'-TTT CAT CAT GCG GAG ATG TTG GAT GG-3'<br>(GI14841) |                                                                                              |
| Normalize Mitochondrial small fragment                  | 221bp           | F: 5'-CCC CAC AAA CCC CAT TAC TAA ACC CA-3'<br>(GI14620) | 75°C – 2 min<br>94°C - 1 min<br>60°C – 45 seg<br>72°C – 45 seg<br>72°C – 10 min<br>17 cycles |
|                                                         |                 | R: 5'-TTT CAT CAT GCG GAG ATG TTG GAT GG-3'<br>(GI14841) |                                                                                              |

F: foward; R: reverse

**Table S2:** Primers used for real-time PCR

| Primer               | Forward 5'-3'            | Reverse 5'-3'           | TM (°C) |
|----------------------|--------------------------|-------------------------|---------|
| hOGG1 <sup>(A)</sup> | GTGGACTCCCACTTCCAAGA     | CGATGTTGTTGTTGGAGGAA    | 55      |
| hOGG1 <sup>(B)</sup> | GTTCTGCCTTCTGGACAATCT    | CCATACTTGATCCGCTAGTACAC | 55      |
| APE1                 | CTGCCTGGACTCTCTCATCAATAC | CCTCATCGCCTATGCCGTAAG   | 57      |
| FEN1                 | CGGGCTGTGGACCTCATC       | CAAGTCGCCGCACGAT        | 58      |
| POL $\beta$          | GTGCAGAGTCCAGTGGTGACA    | CAGTTTTGGCTGTTTGGTTGATT | 57      |
| GAPDH                | CAAGAGCACAAGAGGAAGAGAG   | CTACATGGCAACTGTGAGGAG   | 55      |

In hOGG1 analysis was tested two pairs of primers (A and B) and HS01114116\_G1 OGG1 Taqman Assay (Applied Biosystems, Foster City, CA, USA). hOGG1 mRNA was not found in maternal or in newborns PBMC, differently from the assays using a choriocarcinoma cell line (BeWo, assay control, data not shown).
